# Supplementary material for: Mapping Grassland Classes Using Unmanned Aerial Vehicle and MODIS NDVI Data for Temperate Grassland in Inner Mongolia, China
Source: MDPI journal article supplement (doi:10.3390/rs14092094), 2022-04-27
Supplement: s1 [file s1]

Archive with 1 entries (1 files):
- remotesensing-1664184-supplementary.pdf
